# Supplementary material for: New poly(selenophene–thiophene) bearing π-conjugating spacers for polymer field-effect transistors and photovoltaic cells
Source: Royal Society of Chemistry journal article supplement (doi:10.1039/c5py00306g), 2015-01-01
Supplement: c5py00306g1.pdf [file c5py00306g1.pdf]

Electronic Supplementary Information

**New Poly(Selenophene-Thiophene) Bearing  $\pi$ -Conjugating Spacers for  
Polymer Field-Effect Transistors and Photovoltaic Cells†**

Chi-Chou Chiu, Hung-Chin Wu, Chien Lu, Jung-Yao Chen, and Wen-Chang Chen\*

Department of Chemical Engineering, National Taiwan University,

Taipei, Taiwan 10617

Tel: 886-2-23628398, Fax: 886-2-23623040

E-mail: chenwc@ntu.edu.tw

### Synthesis of Se4T and 2Se4T monomers:

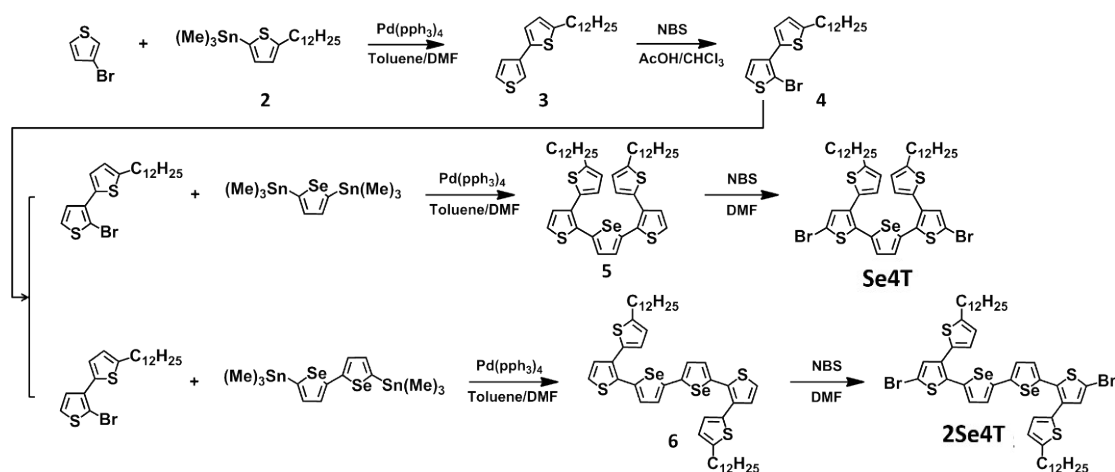

**Scheme S1.** The synthetic route on synthesizing Se<sub>4</sub>T and 2Se<sub>4</sub>T monomers.

### 2-dodecylthiophene (1)

n-Butyllithium (2.5 M in hexanes, 87.9 ml, 220 mmol) was added dropwise to a solution of thiophene (16.8 g, 200 mmol) in anhydrous THF (200 ml) at -78 °C under nitrogen and then the reaction mixture was brought to room temperature. After the mixture was stirred for 1.5 h, 1-bromododecane (64.7g, 260 mmol) was added in one portion and the solution was stirred at room temperature overnight. The solution was added into deionized water and extracted with hexanes twice. The organic extract was dried over MgSO<sub>4</sub> to remove water and purified by vacuum distillation to obtain 25.6g (50.7%) yellow viscous liquid; <sup>1</sup>H NMR (400 MHz, CDCl<sub>3</sub>, δ): aromatic (C-H), 7.10-7.08 (d, 1H), 6.91-6.89 (t, 1H), 6.75 -6.76 (d, 1H), aliphatic (C-H) 2.83-2.78 (t,

2H), 1.68-1.64 (s, 4H), 1.39-1.18 (m, 13H), 0.87-0.85 (t, 6H).

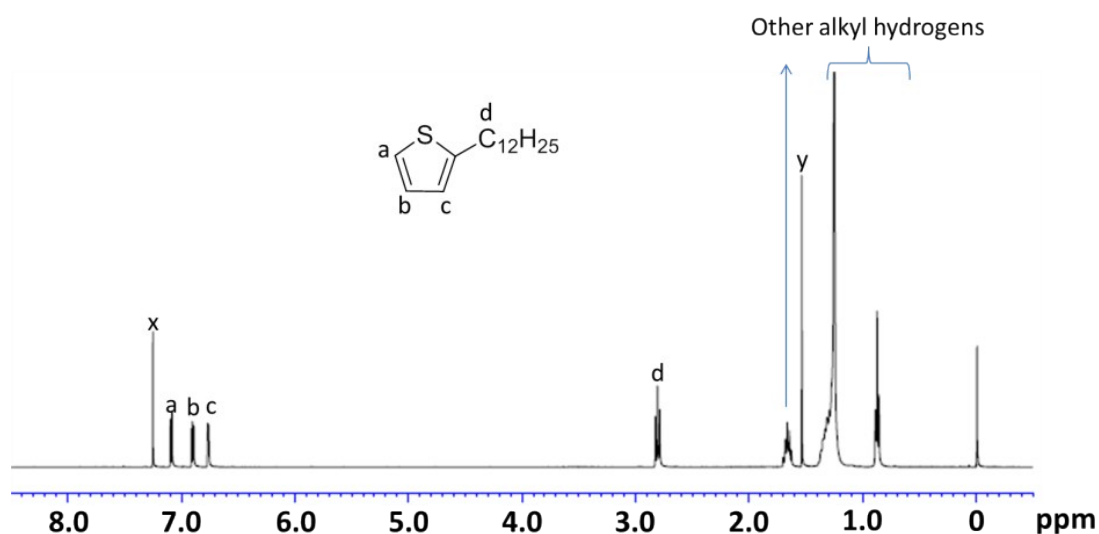

**Fig. S1.**  $^1\text{H}$  NMR Spectrum of 2-dodecylthiophene in  $\text{CDCl}_3$ . (x:  $\text{CDCl}_3$ , y:  $\text{H}_2\text{O}$ )

### **2-dodecyl-5-trimethylstannylthiophene (2)**

Compound 1 (5 g, 20 mmol) was dissolved in anhydrous THF (100 ml) at  $-78^\circ\text{C}$  under nitrogen and then n-butyllithium (2.5 M in hexanes, 9.5 ml, 24 mmol) was added dropwise. The mixture was stirred for 4 h and trimethyltin chloride (5.5 g, 28 mmol) in 5 ml THF was added in one portion and the solution was stirred at room temperature overnight. The solution was poured into deionized water and extracted with hexanes. The organic extract was dried over  $\text{MgSO}_4$  to remove water and evaporated to remove solvent. Yellow viscous liquid was obtained. (6.85 g, 83.3 %);  $^1\text{H}$  NMR (400 MHz,  $\text{CD}_2\text{Cl}_2$ ,  $\delta$ ): aromatic (C-H), 7.00-6.99 (d, 1H), 6.89 -6.88 (d, 1H), aliphatic (C-H) 2.83-2.78 (t, 2H), 1.68-1.64 (m, 4H), 1.39-1.18 (m, 13H), 0.87-

0.85 (t, 6H), 0.39-0.28 (m, 18H).

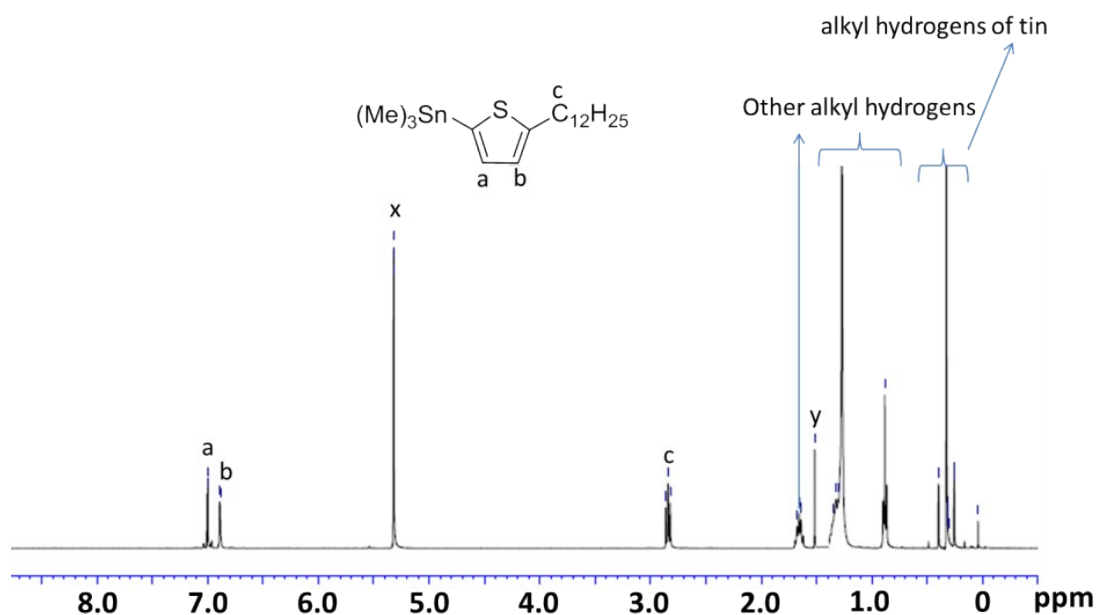

**Fig. S2.**  $^1\text{H}$ -NMR Spectrum of 2-dodecyl-5-trimethylstannylthiophene in  $\text{CD}_2\text{Cl}_2$ . (x:  $\text{CD}_2\text{Cl}_2$ , y:  $\text{H}_2\text{O}$ )

### 5'-dodecyl-3,2'-bithiophene (3)

A solution of 3-bromothiophene (0.98 g, 6.01 mmol), compound 2 (4.4 g, 10.62 mmol), and  $\text{Pd}(\text{PPh}_3)_4$  (250 mg, 0.21 mmol) in DMF (20 mL) and toluene (80 mL) was mixed in a one-neck flask. After three freeze-thaw cycles, the mixture was heated up to 110 °C for 24 h under nitrogen purging. After cooling to room temperature, water was added and then the aqueous phase was extracted with hexane. The organic extract was dried over  $\text{MgSO}_4$  to remove water, and the solvent was evaporated under vacuum. The crude product was purified by flash column using hexane as eluent to give compound 3 (804 mg, 40%) as yellow oil;  $^1\text{H}$  NMR (400 MHz,  $\text{CD}_2\text{Cl}_2$ ,  $\delta$ ):

aromatic (C-H), 7.36-7.34 (d, 1H), 7.31 (s, 1H), 7.02-7.01 (d, 1H), aliphatic (C-H) 2.83-2.78 (t, 2H), 1.68-1.64 (m, 4H), 1.39-1.18 (m, 13H), 0.87-0.85 (t, 6H).

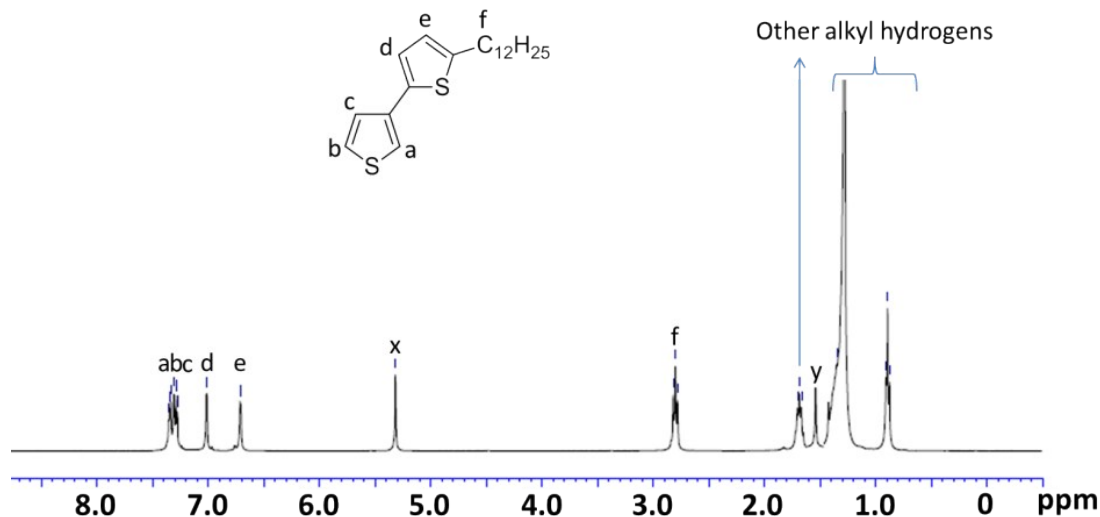

**Fig. S3.**  $^1\text{H}$ -NMR Spectrum of 5'-dodecyl-3,2'-bithiophene in  $\text{CD}_2\text{Cl}_2$ . (x:  $\text{CD}_2\text{Cl}_2$ , y:  $\text{H}_2\text{O}$ )

#### **2-bromo-5'-dodecyl-3,2'-bithiophene (4)**

A solution of compound 3 (804 mg, 2.4 mmol) in chloroform (25 mL) and glacial acetic acid (25 mL) was charged in a three-neck flash under nitrogen-filled dark environment. After the mixture was cooled to 0 °C, n-bromosuccinimide (470.5 mg, 2.64 mmol) was added in one portion. Then the mixture was warmed to room temperature and stirred for 12 h. Water was added and then the aqueous phase was extracted with diethyl ether. The organic extracts were dried over  $\text{MgSO}_4$  and concentrated. The crude product was purified by flash column using hexane/dichloromethane (20/1) as eluent to give compound 4 (893 mg, 90 %) as

yellow oil;  $^1\text{H}$  NMR (400MHz,  $\text{CD}_2\text{Cl}_2$ ,  $\delta$ ): aromatic (C-H), 7.30-7.28 (d, 1H), 7.28-7.26 (d, 1H), 7.18-7.10 (d, 1H), 6.81-6.70 (d, 1H), aliphatic (C-H) 2.83-2.78 (t, 2H), 1.68-1.64 (m, 4H), 1.39-1.18 (m, 13H), 0.87-0.85 (t, 6H).

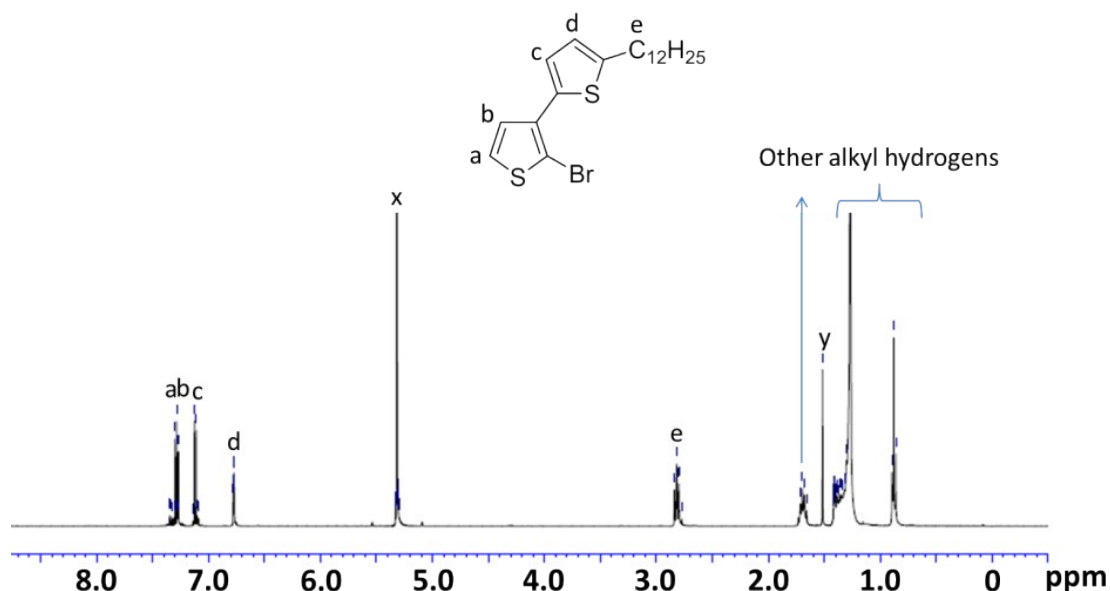

**Fig. S4.**  $^1\text{H}$ -NMR Spectrum of 2-bromo-5'-dodecyl-3,2'-bithiophene in  $\text{CD}_2\text{Cl}_2$ . (x:  $\text{CD}_2\text{Cl}_2$ , y:  $\text{H}_2\text{O}$ )

#### 2,5-bis(5-dodecyl-[2,3'-bithiophen]-2'-yl)selenophene (5)

A solution of compound 4 (893 mg, 2.2 mmol), 2,5-bis(trimethylstannyl)-selenophene (Se) (448 mg, 1 mmol), and  $\text{Pd}(\text{PPh}_3)_4$  (34 mg, 29.4 mmol) in DMF (20 mL) and toluene (80 mL) was mixed in a one-neck flask. After three freeze-thaw cycles, the mixture was heated up to 110  $^\circ\text{C}$  for 24 h under nitrogen purging. After cooling to room temperature, water was added and then the aqueous phase was extracted with ethyl acetate. The organic extract was dried over  $\text{MgSO}_4$  to remove water, and the solvent was evaporated under vacuum. The crude product was purified by flash

column using hexane/chloroform (20/1) as eluent to give compound 5 (351 mg, 45 %) as yellow oil;  $^1\text{H}$  NMR (400MHz,  $\text{CD}_2\text{Cl}_2$ ,  $\delta$ ): aromatic (C-H), 7.22-7.21 (d, 2H), 7.21-7.20 (d, 2H), 7.06-7.04 (d, 2H), 6.87-6.86 (d, 2H), 6.67-6.66(d, 2H), aliphatic (C-H) 2.83-2.78 (t, 2H), 1.68-1.64 (m, 4H), 1.39-1.18 (m, 13H), 0.87-0.85 (t, 6H).

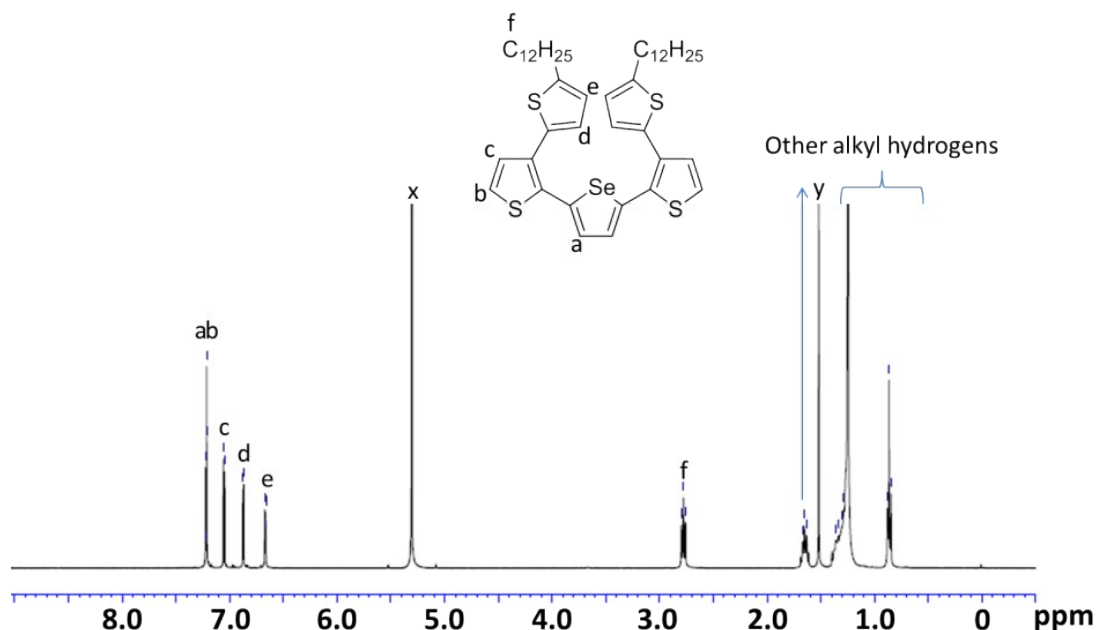

**Fig. S5.**  $^1\text{H}$ -NMR Spectrum of 2,5-bis(5-dodecyl-[2,3'-bithiophen]-2'-yl)selenophene in  $\text{CD}_2\text{Cl}_2$ . (x:  $\text{CD}_2\text{Cl}_2$ , y:  $\text{H}_2\text{O}$ )

#### 5,5'-bis(5-dodecyl-[2,3'-bithiophen]-2'-yl)-2,2'-biselenophene (6)

A solution of compound 4 (880 mg, 2.13 mmol), 5,5'-Bis(trimethylstannyl)-2,2'-biselenophene (2Se) (567 mg, 0.97 mmol), and  $\text{Pd}(\text{PPh}_3)_4$  (33 mg, 29.1 mmol) DMF (20 mL) and toluene (80 mL) was mixed in a one-neck flask. After three freeze-thaw cycles, the mixtures was heated up to 110  $^\circ\text{C}$  for 24 h under nitrogen purging. After cooling to room temperature, water was added and then the aqueous phase was

extracted with ethyl acetate. The organic extract was dried over  $\text{MgSO}_4$  to remove water, and the solvent was evaporated under vacuum. The crude product was purified by flash column using hexane/chloroform (20/1) as eluent to give compound 6 (461 mg, 50 %) as yellow oil;  $^1\text{H}$  NMR (400 MHz,  $\text{CD}_2\text{Cl}_2$ ,  $\delta$ ): aromatic (C-H), 7.25-7.23 (d, 2H), 7.22-7.20 (d, 2H), 7.07-7.06 (d, 2H), 7.06-7.05(d, 2H), 6.92-6.91 (d, 2H), 6.74-6.73 (d, 2H), aliphatic (C-H), 2.83-2.78 (t, 2H), 1.68-1.64 (m, 4H), 1.39-1.18 (m, 13H), 0.87-0.85 (t, 6H).

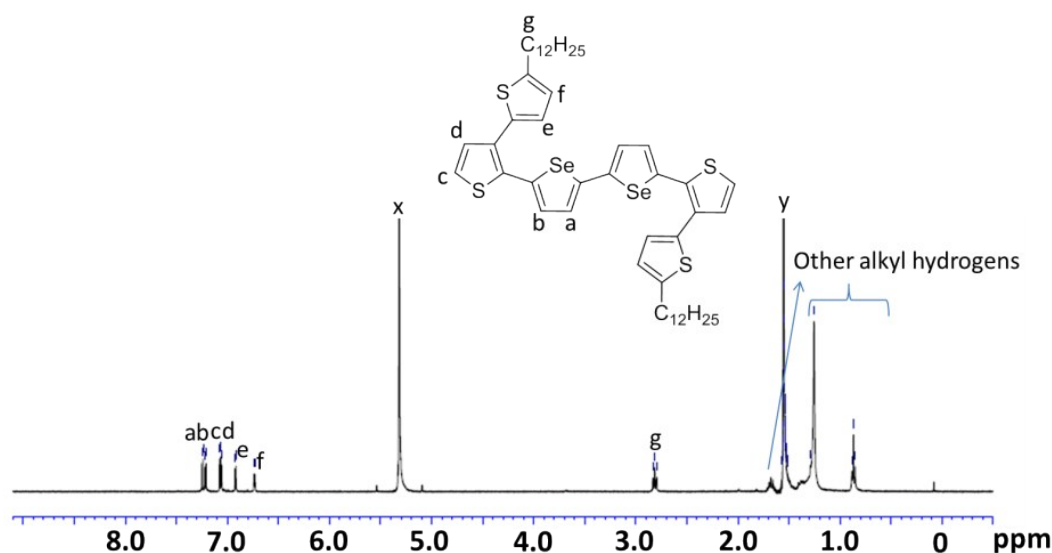

**Fig. S6.**  $^1\text{H}$ -NMR Spectrum of 5,5'-bis(5-dodecyl-[2,3'-bithiophen]-2'-yl)-2,2'-biselenophene in  $\text{CD}_2\text{Cl}_2$ . (x:  $\text{CD}_2\text{Cl}_2$ , y:  $\text{H}_2\text{O}$ )

**2,5-bis(5'-bromo-5-dodecyl-[2,3'-bithiophen]-2'-yl)selenophene (Se4T)**

A solution of compound 5 (351 mg, 0.4 mmol) in DMF (40 mL) and toluene (10 mL) was charged in a three-neck flash under nitrogen-filled dark environment. After the mixture was cooled to 0  $^\circ\text{C}$ , n-bromosuccinimide (172.3 mg, 0.96 mmol) was



added in one portion. Then the mixture was warmed to room temperature and stirred for 12 h. Water was added and then the aqueous phase was extracted with diethyl ether. The organic extracts were dried over  $\text{MgSO}_4$  and concentrated. The crude product was purified by flash column using hexane as eluent to give Se4T (411.4 mg, 98%) as orange oil;  $^1\text{H}$  NMR (400 MHz,  $\text{CD}_2\text{Cl}_2$ ,  $\delta$ ): aromatic (C-H), 7.24-7.23 (d, 2H), 7.22-7.21 (d, 2H), 7.07-7.06 (d, 2H), 6.67-6.66 (d, 2H), aliphatic (C-H), 2.83-2.78 (t, 4H), 1.68-1.64 (m, 8H), 1.39-1.18 (m, 26H), 0.87-0.85 (t, 12H).

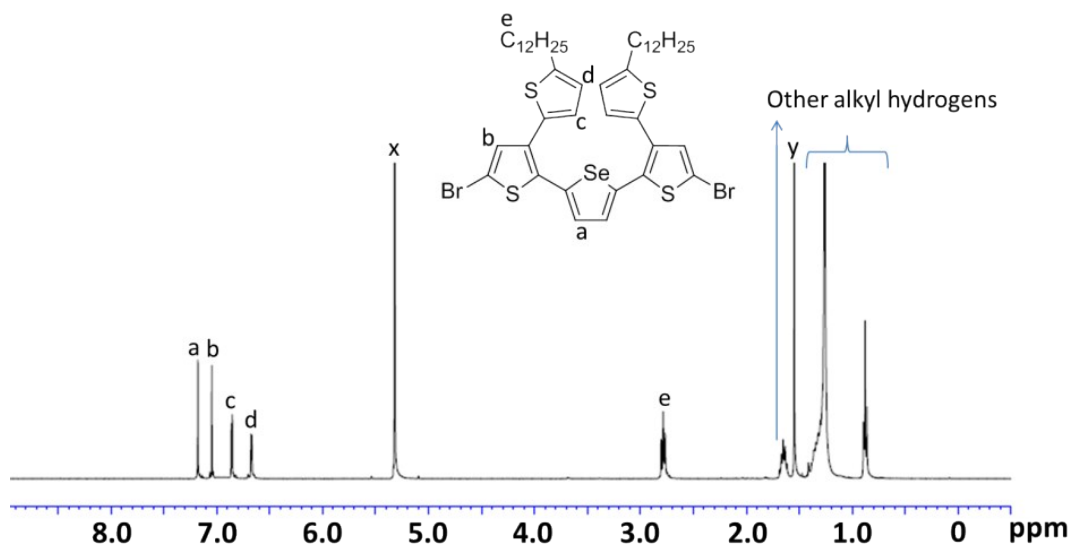

**Fig. S7.**  $^1\text{H}$ -NMR Spectrum of Se4T in  $\text{CD}_2\text{Cl}_2$ . (x:  $\text{CD}_2\text{Cl}_2$ , y:  $\text{H}_2\text{O}$ )

**5,5'-bis(5'-bromo-5-dodecyl-[2,3'-bithiophen]-2'-yl)-2,2'-biselenophene (2Se4T)**

A solution of compound 6 (351 mg, 0.4 mmol) in DMF (40 mL) and toluene (10 mL) was charged in a three-neck flash under nitrogen-filled dark environment. After the mixture was cooled to 0  $^\circ\text{C}$ , n-bromosuccinimide (189.5 mg, 1.1 mmol) was added in one portion. Then the mixture was warmed to room temperature and stirred for 12 h.

Water was added and then the aqueous phase was extracted with diethyl ether. The organic extracts were dried over  $\text{MgSO}_4$  and concentrated. The crude product was purified by flash column using hexane as eluent to give 2Se4T (513.7 mg, 98%) as orange oil;  $^1\text{H}$  NMR (400 MHz,  $\text{CD}_2\text{Cl}_2$ ,  $\delta$ ): aromatic (C-H), 7.22-7.20 (s, 2H), 7.07-7.06 (d, 2H), 7.06-7.05 (d, 2H), 6.92-6.91 (d, 2H), 6.74-6.73 (d, 2H), aliphatic (C-H), 2.83-2.78 (t, 4H), 1.68-1.64 (m, 8H), 1.39-1.18 (m, 26H), 0.87-0.85 (t, 12H).

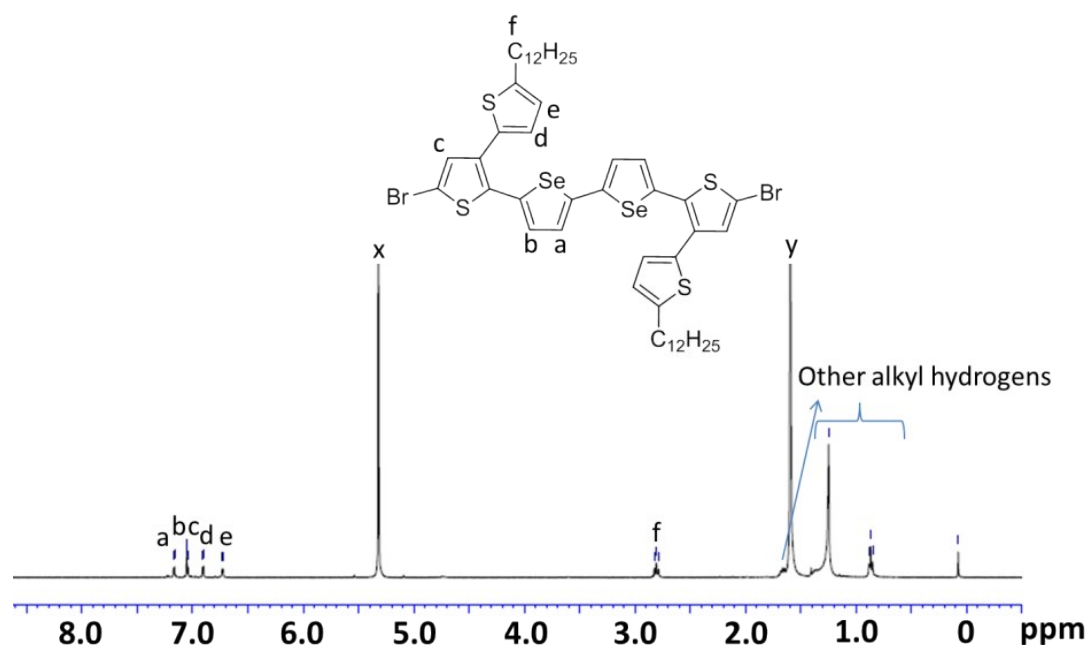

**Fig. S8.**  $^1\text{H}$ -NMR Spectrum of 2Se4T in  $\text{CD}_2\text{Cl}_2$ . (x:  $\text{CD}_2\text{Cl}_2$ , y:  $\text{H}_2\text{O}$ )

**Table S1.** Solubility behavior of the synthesized conjugated polymers

| Polymer         | Chloroform <sup>a</sup>  | <i>o</i> -Dichlorobenzene <sup>a</sup> |
|-----------------|--------------------------|----------------------------------------|
| <b>PSe4TV</b>   | 5.4 mg ml <sup>-1</sup>  | 9.6 mg ml <sup>-1</sup>                |
| <b>PSe4TT</b>   | 4.9 mg ml <sup>-1</sup>  | 9.1 mg ml <sup>-1</sup>                |
| <b>PSe4T2T</b>  | 6.3 mg ml <sup>-1</sup>  | 9.7 mg ml <sup>-1</sup>                |
| <b>PSe4TTT</b>  | > 10 mg ml <sup>-1</sup> | > 10 mg ml <sup>-1</sup>               |
| <b>P2Se4TTT</b> | > 10 mg ml <sup>-1</sup> | > 10 mg ml <sup>-1</sup>               |

<sup>a</sup>The polymer solutions were prepared as 10 mg ml<sup>-1</sup> initially.

**Table S2.** Photovoltaic characteristics of Se4T- and 2Se4T-based polymer/PC<sub>61</sub>BM blends<sup>a</sup>

| Polymer         | Polymer:PC <sub>61</sub> BM | $V_{oc}$<br>(V) | $J_{sc}$<br>(mA cm <sup>-2</sup> ) | FF<br>(-) | PCE <sup>b</sup><br>(%) |
|-----------------|-----------------------------|-----------------|------------------------------------|-----------|-------------------------|
| <b>PSe4TV</b>   | 1:2                         | 0.63            | 2.17                               | 0.316     | 0.43                    |
| <b>PSe4T2T</b>  | 1:2                         | 0.45            | 3.21                               | 0.295     | 0.42                    |
| <b>PSe4TTT</b>  | 1:2                         | 0.61            | 3.21                               | 0.308     | 0.61                    |
| <b>P2Se4TTT</b> | 1:2                         | 0.76            | 4.19                               | 0.371     | 1.18                    |

<sup>a</sup>*o*-Dichlorobenzene as the processing solvent. <sup>b</sup>The average value of PCE is calculated from at least 5 devices.

(a) PSe4TV

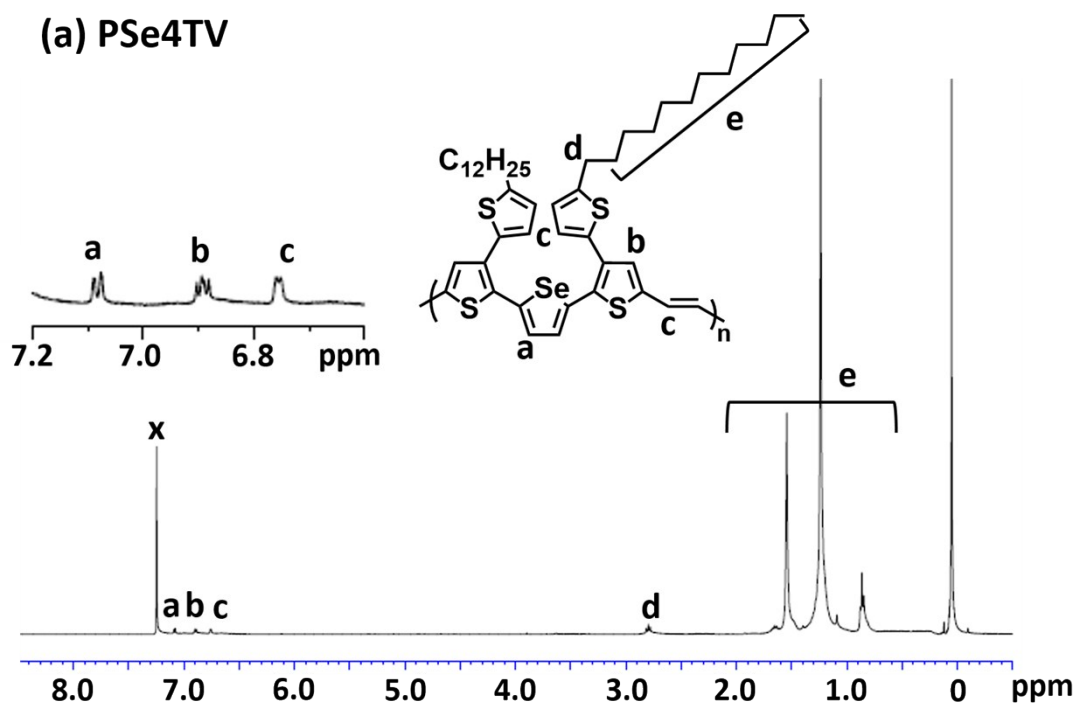

(b) PSe4TT

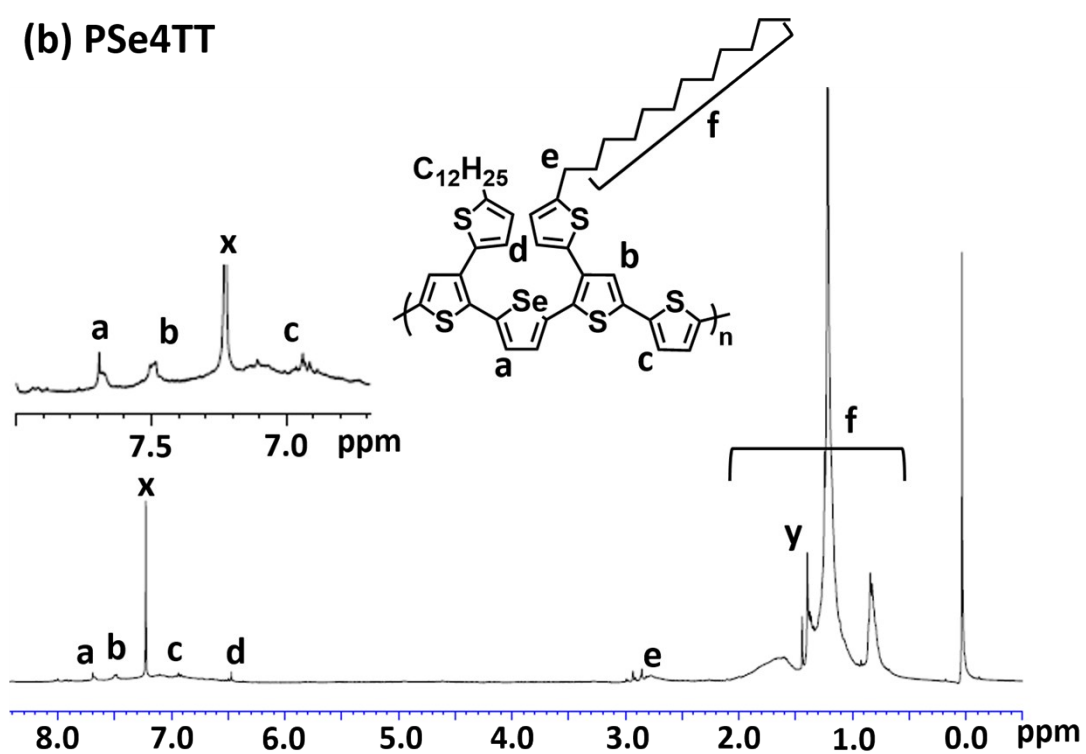

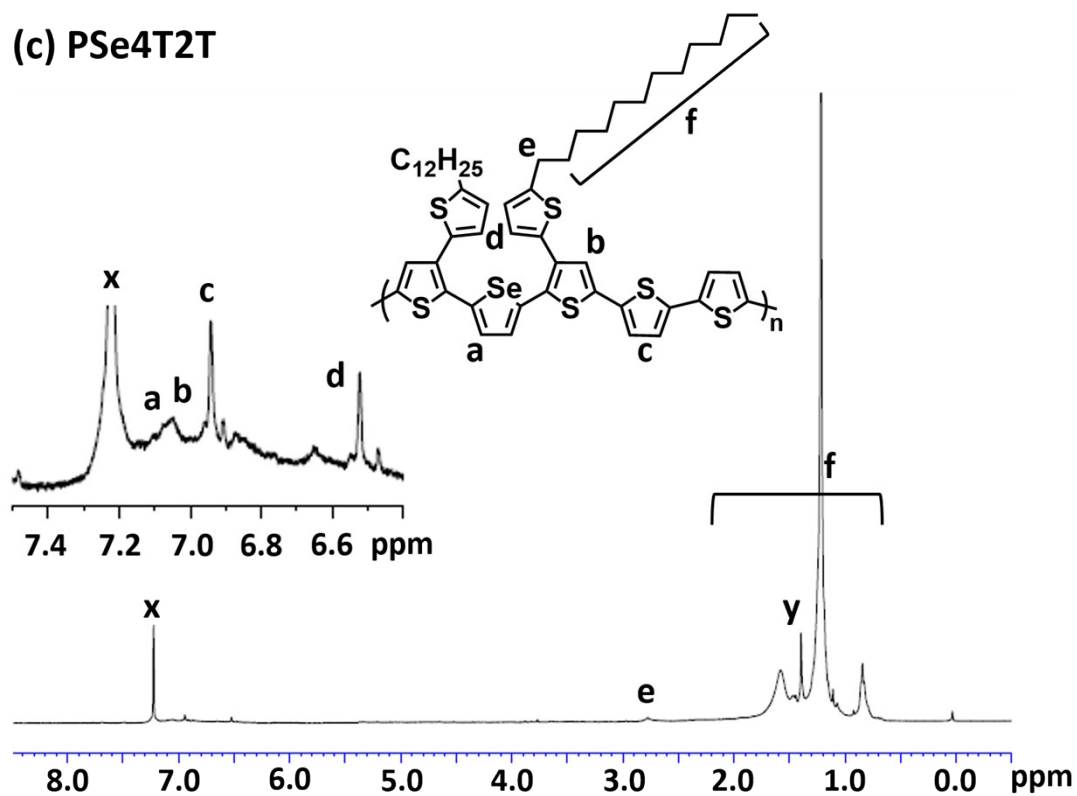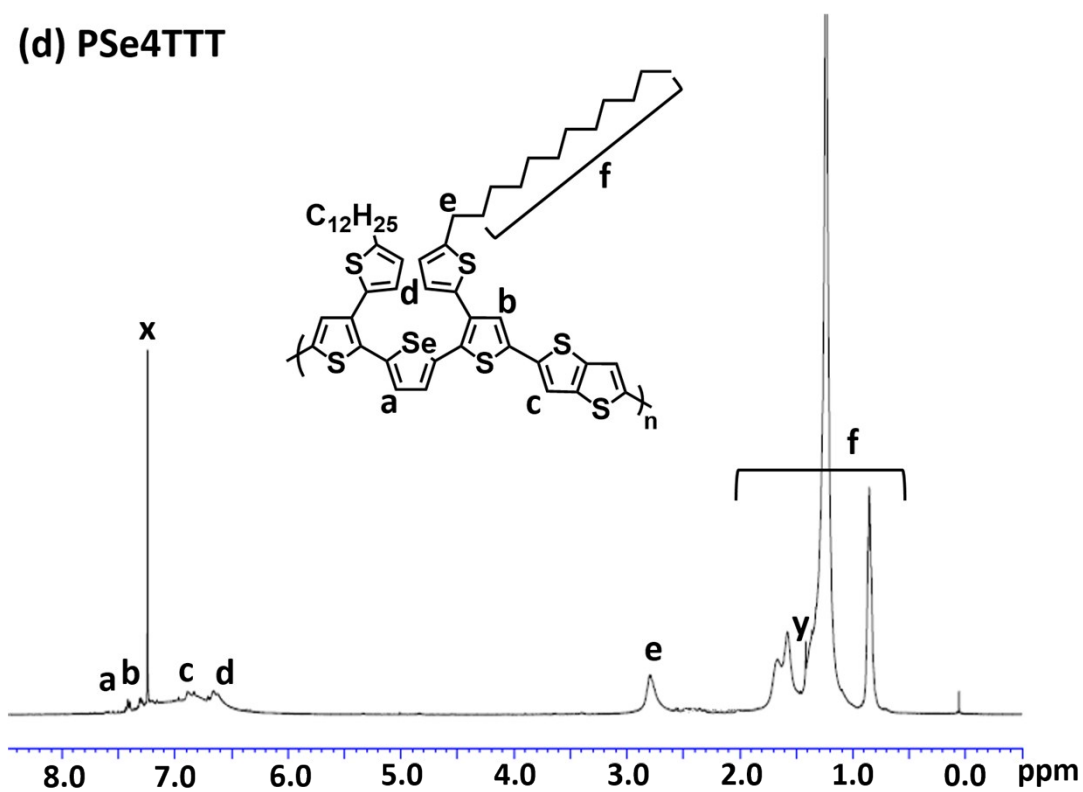

**Fig. S9.**  $^1H$ -NMR Spectra of (a) PSe4TV, (b) PSe4TT, (c) PSe4T2T, and (d) PSe4TTT in  $CDCl_3$ . (x:  $CDCl_3$ , y:  $H_2O$ )

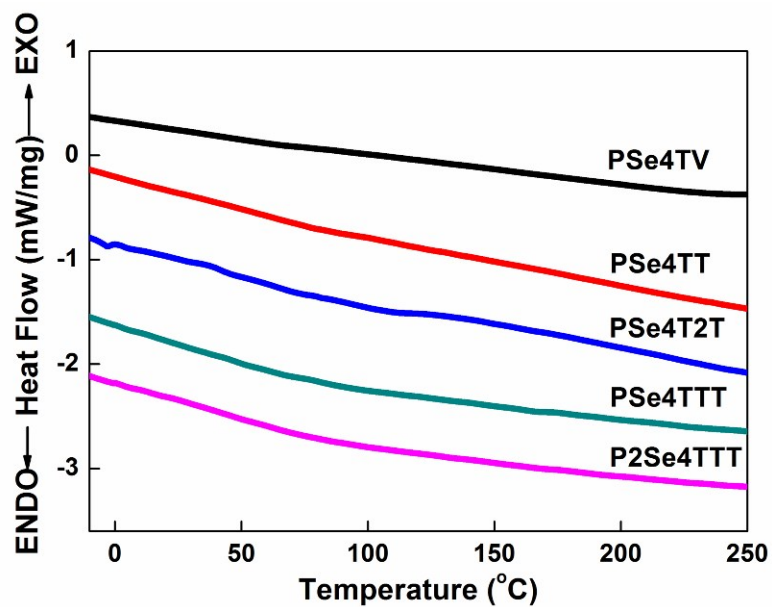

**Fig. S10.** DSC traces of the studied polymers with a scanning rate of 10 °C min<sup>-1</sup> under nitrogen atmosphere.

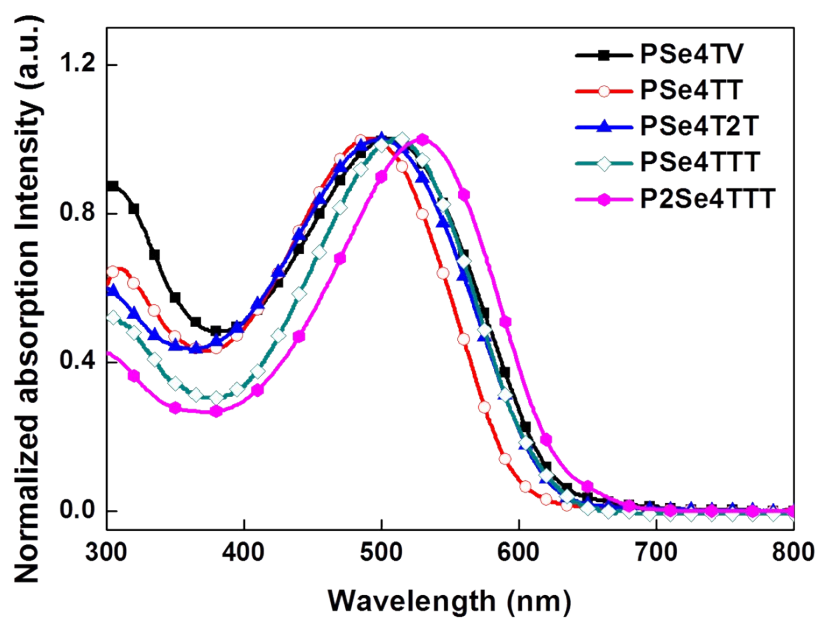

**Fig. S11.** UV-Vis spectra of the studied polymers in *o*-dichlorobenzene solution.

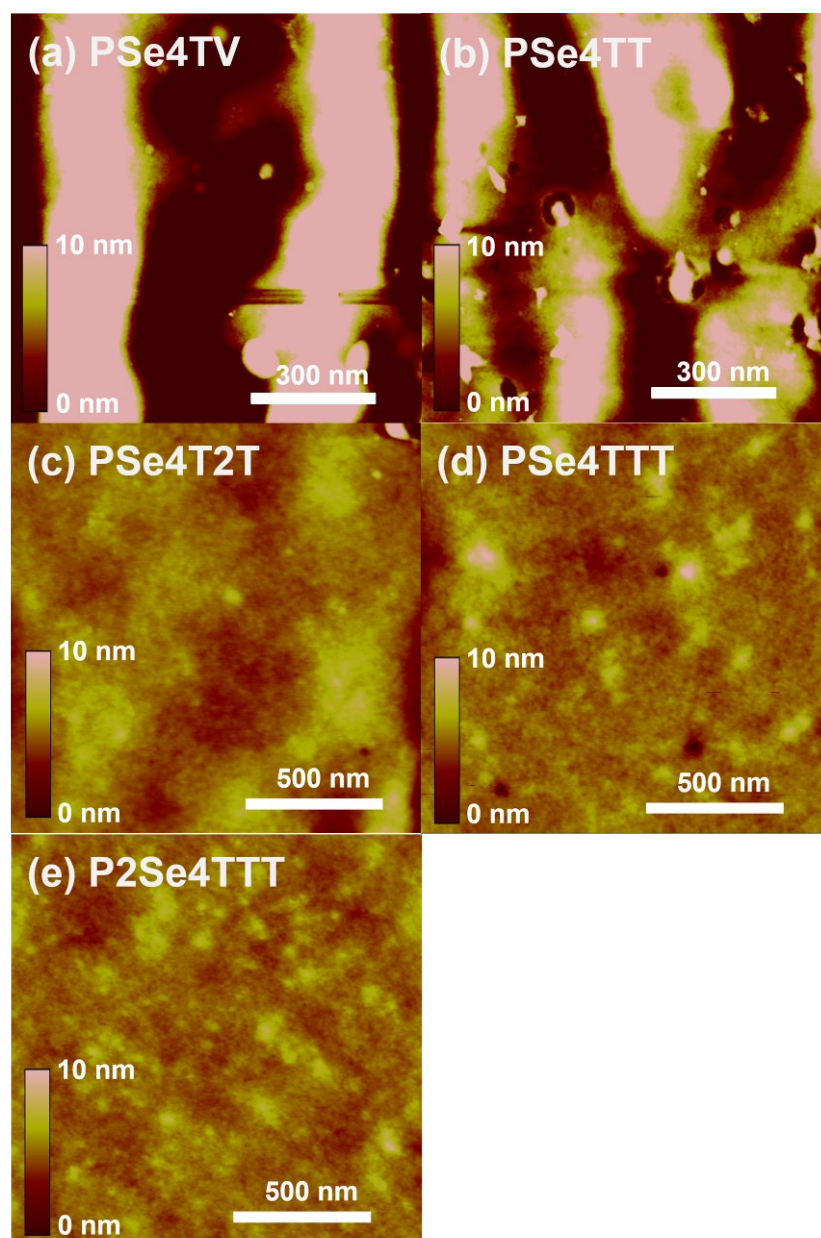

**Fig. S12.** Topographical AFM images of the (a) **PSe4TV**, (b) **PSe4TT**, (c) **PSe4T2T**, (d) **PSe4TTT**, and (e) **P2Se4TTT** spin-coated thin film.

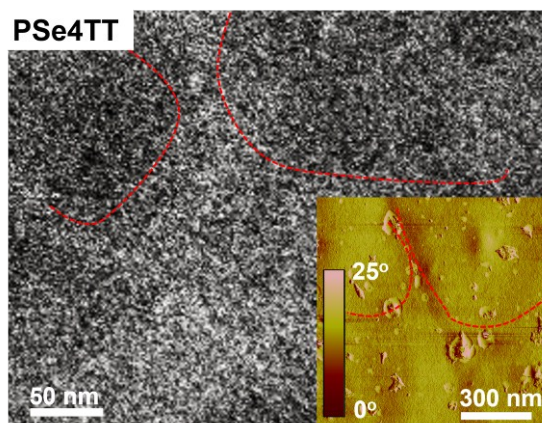

**Fig. S13.** TEM and AFM phase images of **PSe4TT** thin film surfaces. Large aggregates ( $> 100$  nm) could be found on **PSe4TT** surface (red dash line).

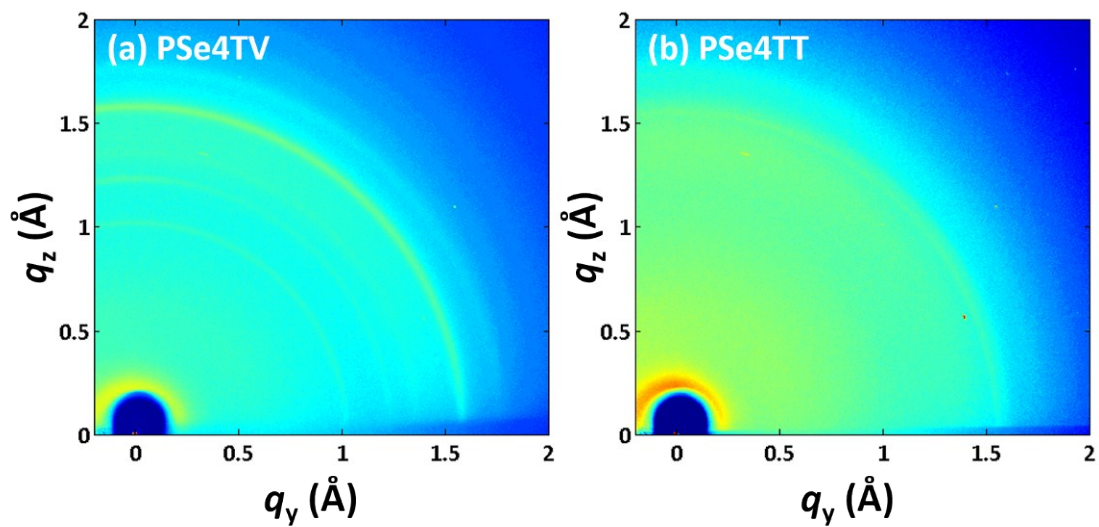

**Fig. S14.** Representative 2D GIXD pattern of (a) PSe4TV and (b) PSe4TT thin films annealed at 140 °C for 1 h under vacuum.



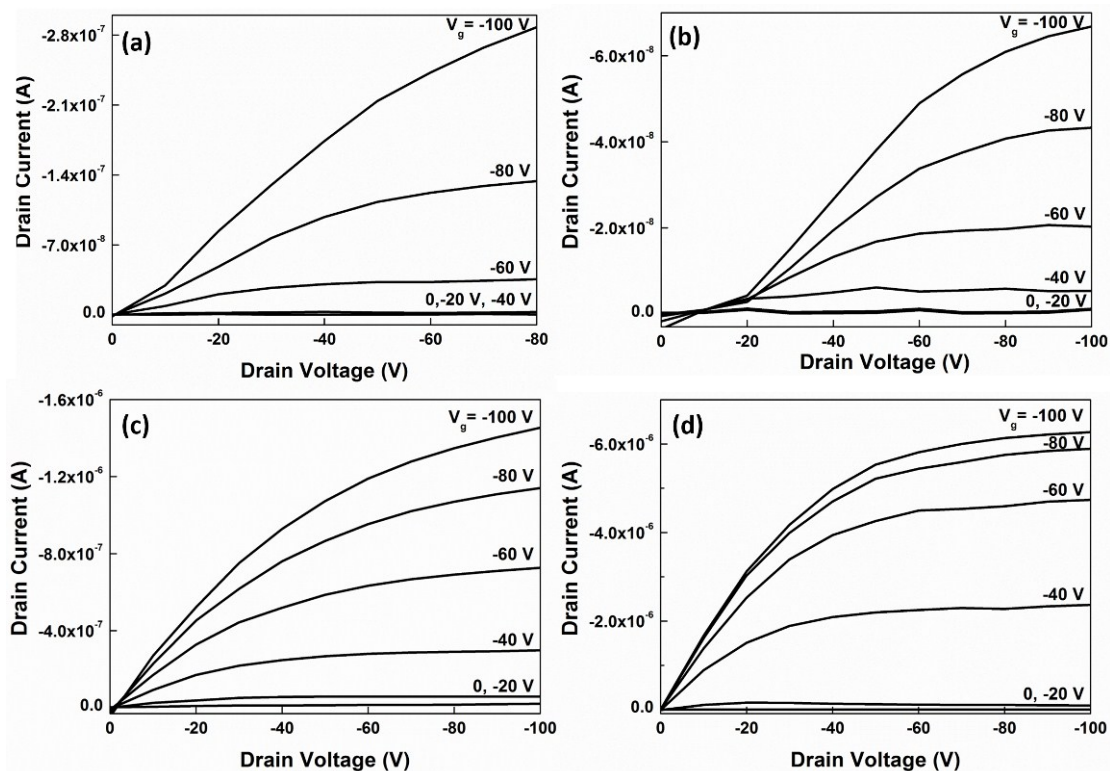

**Fig. S15.** Output characteristics of the (a) PSe4TV, (b) PSe4TT, (c) PSe4T2T, and (d) PSe4TTT.

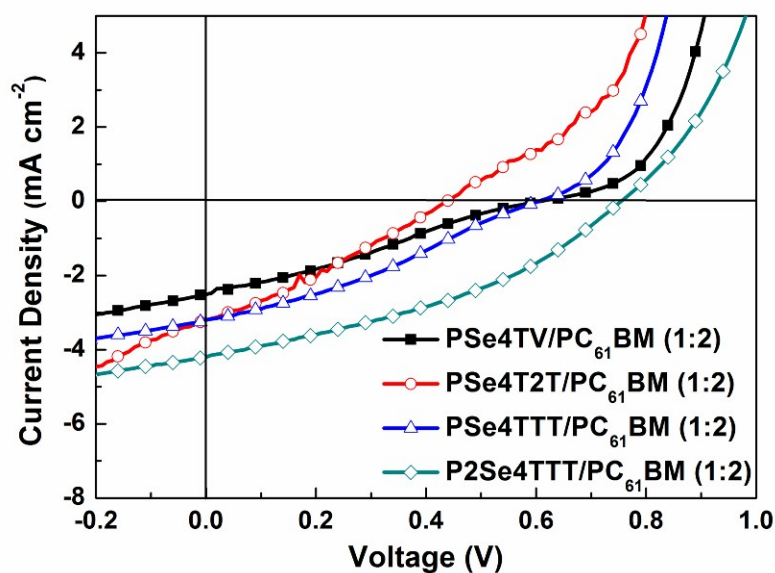

**Fig. S16.** PV characteristics of Se4T- or 2Se4T-based polymer/PC<sub>61</sub>BM blends under the illumination with AM 1.5G solar simulated light (100 mW cm<sup>-2</sup>).

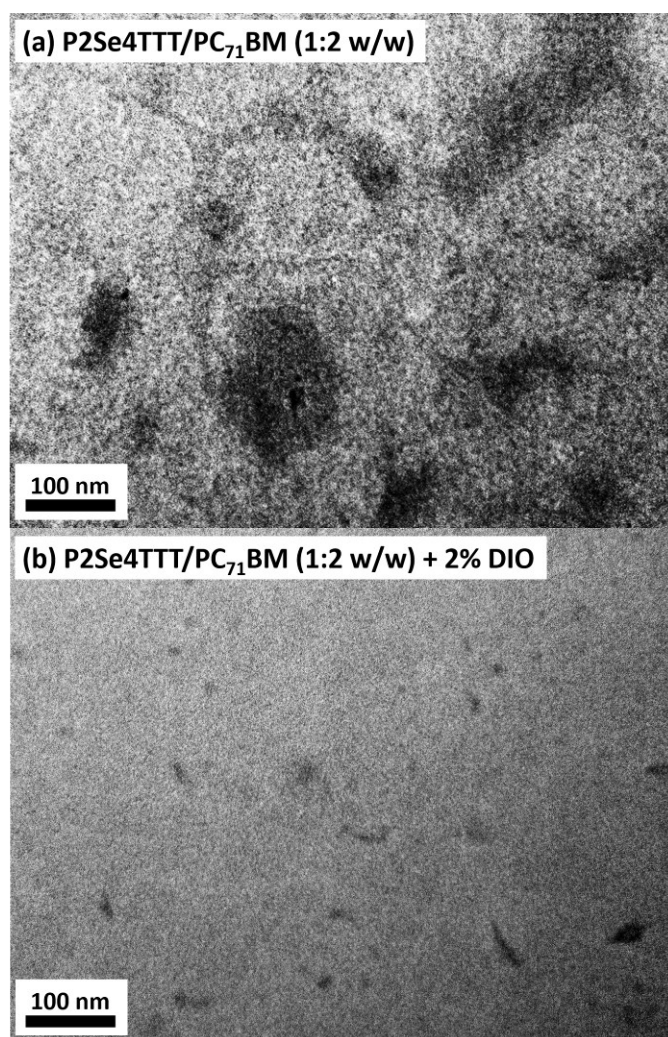

**Fig. S17.** TEM images of **P2Se4TTT/PC<sub>71</sub>BM** (1:2, w/w) blending thin film using (a) pure o-DCB and (b) o-DCB/DIO (98/2 v/v) as processing solvent. Large aggregates (> 100 nm) are observed in the films prepared using pure o-DCB. After adding DIO into **P2Se4TTT/PC<sub>71</sub>BM** blends, the size of aggregates are significantly reduced, exhibiting the thin film with better uniformity.
